# Supplementary material for: Merits of microwave plasmas for optical emission spectrometry – characterization of an axially viewed microwave-sustained, inductively coupled, atmospheric-pressure plasma (MICAP)
Source: Royal Society of Chemistry journal article supplement (doi:10.1039/d0ja00293c), 2020-01-01
Supplement: d0ja00293c1.pdf [file d0ja00293c1.pdf]

## Electronic supplementary information

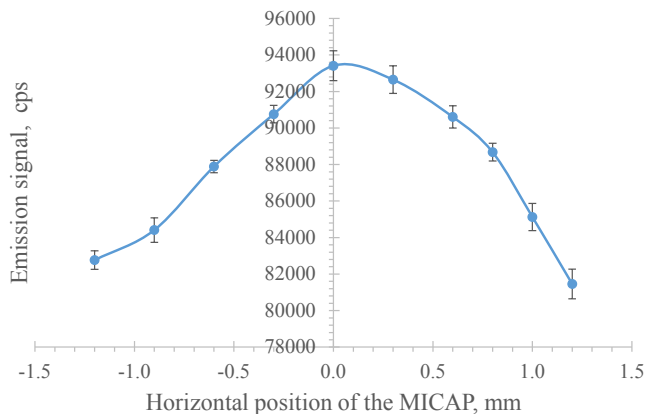

ESI Figure 1. Mn (II) 257.611 nm emission line signal as a function of the horizontal position of the MICAP with respect to the spectrometer (n=5; 1 mg L<sup>-1</sup> Mn; 1000 W)

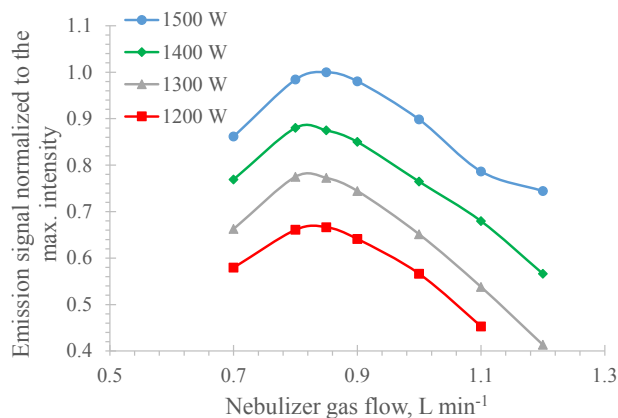

ESI Figure 2. Normalized Mn (II) 257.611 nm emission line signal (1 mg L<sup>-1</sup> Mn) as a function of nebulizer gas flow and microwave power; SDs are not plotted for clarity but all RSD's < 2% (n=5); intensity data have been normalized to the maximum measured signal (0.85 L min<sup>-1</sup> and 1500 W)

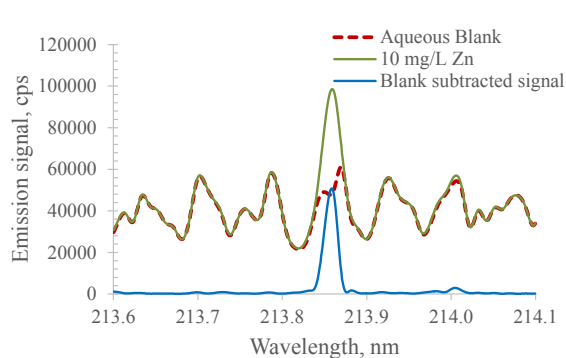

a)

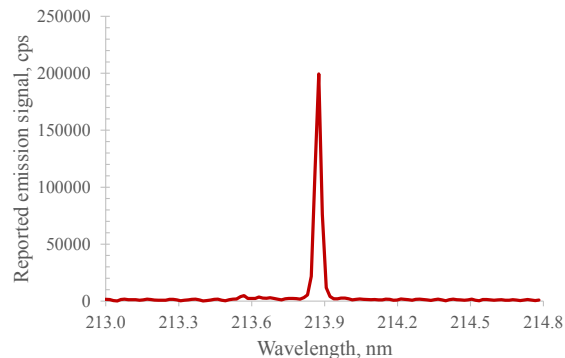

b)

ESI Figure 3. Spectrum of 10 mg L<sup>-1</sup> Zn at 213.856 nm recorded with a) MICAP and b) Hammer cavity MIP-OES. The well isolated emission line of Zn in spectrum b) clearly shows the effectiveness of the mathematical background subtraction. Note, that due to the different optical resolution of the used spectrometers (18 pm for MICAP; 30 pm for Hammer cavity MIP-OES) the wavelength interval shown in a) is smaller than in b).

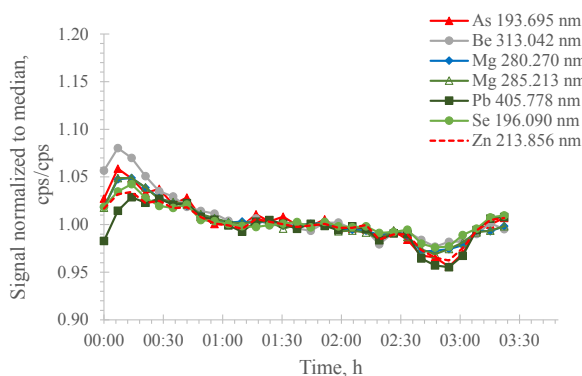

a)

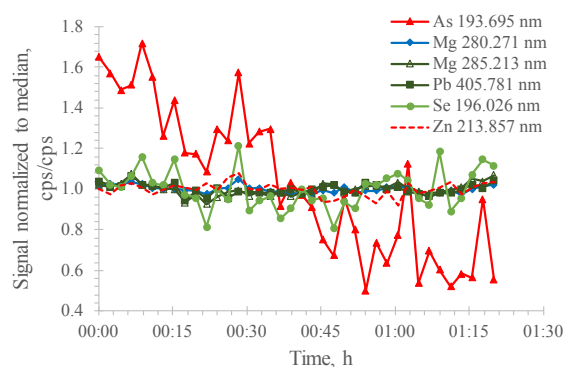

b)

ESI Figure 4. Variation of the emission signals of selected lines of As, Be (only for MICAP), Mg, Pb, Se and Zn determined using a) MICAP and b) Hammer cavity MIP-OES. The signals were normalized to the respective median signal of each line; SDs not plotted for clarity but RSD's < 2% (n=5); 10 mg L<sup>-1</sup> of each element. Note the different scaling of the y axis

ESI Table 1. MICAP and ICP-OES: Limits of detection (LOD; calculated by blank method) and limits of quantification (LOQ; calculated by calibration method) of selected emission lines determined by MICAP (nitrogen as plasma gas) and ICP-OES (argon as plasma gas); lines were no emission signal above 3  $\sigma$  of the background was obtained at the highest calibration standard are marked with "no signal"

| Element, emission line | Total line energy, eV | MICAP operated with N <sub>2</sub> |                           | MICAP operated with air   |                           | ICP-OES                   |                           |
|------------------------|-----------------------|------------------------------------|---------------------------|---------------------------|---------------------------|---------------------------|---------------------------|
|                        |                       | LOD, $\mu\text{g L}^{-1}$          | LOQ, $\mu\text{g L}^{-1}$ | LOD, $\mu\text{g L}^{-1}$ | LOQ, $\mu\text{g L}^{-1}$ | LOD, $\mu\text{g L}^{-1}$ | LOQ, $\mu\text{g L}^{-1}$ |
| Ag (I) 328.068 nm      | 3.8                   | 4                                  | 8                         | 1                         | 6                         | 0.8                       | 4                         |
| Ag (I) 338.289 nm      | 3.7                   | 8                                  | 10                        | 2                         | 6                         | 3                         | 5                         |
| Al (II) 167.078 nm     | 13.4                  | 50                                 | 70                        | no signal                 | no signal                 | 0.6                       | 11                        |
| Al (I) 396.152 nm      | 3.1                   | 1                                  | 9                         | 1                         | 5                         | 2                         | 6                         |
| As (I) 189.042 nm      | 6.6                   | 300                                | 400                       | no signal                 | no signal                 | 6                         | 14                        |
| As (I) 193.759 nm      | 6.4                   | 200                                | 300                       | no signal                 | no signal                 | 7                         | 14                        |
| As (I) 228.812 nm      | 6.8                   | 100                                | 200                       | no signal                 | no signal                 | 1                         | 4                         |
| B (I) 249.677 nm       | 5.0                   | 10                                 | 30                        | no signal                 | no signal                 | 4                         | 24                        |
| B (I) 249.773 nm       | 5.0                   | 8                                  | 10                        | 200                       | 300                       | 0.8                       | 8                         |
| Ba (II) 233.527 nm     | 11.2                  | 10                                 | 20                        | 200                       | 1000                      | 0.4                       | 5                         |
| Ba (II) 455.404 nm     | 7.9                   | 0.1                                | 2                         | 0.1                       | 2                         | 0.05                      | 3                         |
| Be (I) 234.861 nm      | 5.3                   | 1                                  | 2                         | 10                        | 10                        | 0.1                       | 4                         |
| Be (II) 313.042 nm     | 13.3                  | 2                                  | 2                         | 80                        | 90                        | 0.2                       | 3                         |
| Bi (II) 190.241 nm     | 15.9                  | no signal                          | no signal                 | no signal                 | no signal                 | 10                        | 20                        |
| Bi (I) 222.825 nm      | 5.6                   | 400                                | 500                       | no signal                 | no signal                 | 20                        | 30                        |
| Bi (I) 223.061 nm      | 5.6                   | 100                                | 200                       | 700                       | 800                       | 8                         | 10                        |
| Ca (II) 317.933 nm     | 13.2                  | 20                                 | 20                        | 200                       | 600                       | 1                         | 6                         |
| Ca (II) 393.366 nm     | 9.3                   | 0.2                                | 2                         | 0.1                       | 3                         | 0.5                       | 3                         |
| Ca (II) 396.847 nm     | 9.2                   | 0.2                                | 2                         | 0.1                       | 2                         | 0.5                       | 3                         |
| Cd (II) 214.438 nm     | 14.8                  | 40                                 | 60                        | no signal                 | no signal                 | 0.5                       | 4                         |
| Cd (II) 226.502 nm     | 14.5                  | 30                                 | 50                        | no signal                 | no signal                 | 0.8                       | 4                         |
| Cd (I) 228.802 nm      | 5.4                   | 10                                 | 20                        | no signal                 | no signal                 | 1                         | 4                         |
| Co (II) 228.616 nm     | 13.7                  | 30                                 | 60                        | no signal                 | no signal                 | 1                         | 5                         |
| Co (II) 238.892 nm     | 13.5                  | 20                                 | 30                        | no signal                 | no signal                 | 0.8                       | 5                         |
| Cr (II) 205.552 nm     | 12.8                  | 80                                 | 90                        | no signal                 | no signal                 | 0.8                       | 4                         |
| Cr (II) 267.716 nm     | 12.9                  | 30                                 | 40                        | no signal                 | no signal                 | 0.5                       | 4                         |
| Cr (II) 283.563 nm     | 12.7                  | 20                                 | 30                        | no signal                 | no signal                 | 4                         | 9                         |
| Cu (I) 324.754 nm      | 3.8                   | 4                                  | 5                         | 6                         | 9                         | 2                         | 6                         |
| Cu (I) 327.396 nm      | 3.8                   | 7                                  | 10                        | 7                         | 9                         | 2                         | 5                         |
| Fe (II) 238.204 nm     | 13.1                  | 20                                 | 30                        | no signal                 | no signal                 | 0.7                       | 4                         |
| Fe (II) 239.562 nm     | 13.1                  | 10                                 | 20                        | no signal                 | no signal                 | 0.5                       | 4                         |
| Fe (II) 259.941 nm     | 12.7                  | 4                                  | 10                        | no signal                 | no signal                 | 0.4                       | 4                         |

| Element, emission line | Total line energy, eV | MICAP operated with N <sub>2</sub> |                           | MICAP operated with air   |                           | ICP-OES                   |                           |
|------------------------|-----------------------|------------------------------------|---------------------------|---------------------------|---------------------------|---------------------------|---------------------------|
|                        |                       | LOD, $\mu\text{g L}^{-1}$          | LOQ, $\mu\text{g L}^{-1}$ | LOD, $\mu\text{g L}^{-1}$ | LOQ, $\mu\text{g L}^{-1}$ | LOD, $\mu\text{g L}^{-1}$ | LOQ, $\mu\text{g L}^{-1}$ |
| K (I) 766.491 nm       | 1.6                   | 1                                  | 8                         | no signal                 | no signal                 | 6                         | 10                        |
| Li (I) 670.780 nm      | 1.8                   | 0.1                                | 3                         | 0.02                      | 2                         | 0.1                       | 7                         |
| Mg (II) 280.27 nm      | 12.1                  | 0.3                                | 3                         | 10                        | 20                        | 0.08                      | 4                         |
| Mg (I) 285.213 nm      | 4.3                   | 0.6                                | 3                         | 2                         | 3                         | 0.6                       | 6                         |
| Mn (II) 257.611 nm     | 12.2                  | 3                                  | 5                         | 100                       | 400                       | 0.1                       | 4                         |
| Mn (II) 259.373 nm     | 12.2                  | 1                                  | 3                         | 40                        | 50                        | 0.09                      | 1                         |
| Mn (I) 403.076 nm      | 3.1                   | 2                                  | 9                         | 4                         | 5                         | 3                         | 7                         |
| Mo (II) 202.030 nm     | 13.2                  | no signal                          | no signal                 | no signal                 | no signal                 | 2                         | 5                         |
| Mo (II) 281.615 nm     | 12.8                  | 30                                 | 40                        | no signal                 | no signal                 | 4                         | 7                         |
| Mo (I) 379.825 nm      | 3.3                   | 20                                 | 30                        | no signal                 | no signal                 | 6                         | 10                        |
| Na (I) 588.995 nm      | 2.1                   | 5                                  | 8                         | 1                         | 5                         | 3                         | 10                        |
| Na (I) 589.592 nm      | 2.1                   | 5                                  | 7                         | 2                         | 5                         | 2                         | 10                        |
| Ni (II) 231.604 nm     | 14.0                  | 100                                | 200                       | no signal                 | no signal                 | 1                         | 5                         |
| Ni (I) 232.003 nm      | 5.3                   | 60                                 | 70                        | no signal                 | no signal                 | 4                         | 7                         |
| Ni (I) 352.454 nm      | 3.5                   | 60                                 | 100                       | no signal                 | no signal                 | 5                         | 9                         |
| P (I) 177.495 nm       | 7.0                   | 200                                | 1000                      | no signal                 | no signal                 | 10                        | 50                        |
| P (I) 178.287 nm       | 7.0                   | 300                                | 900                       | no signal                 | no signal                 | 20                        | 50                        |
| P (I) 213.618 nm       | 7.2                   | 400                                | 600                       | no signal                 | no signal                 | 9                         | 40                        |
| Pb (II) 220.353 nm     | 14.8                  | no signal                          | no signal                 | no signal                 | no signal                 | 3                         | 9                         |
| Pb (I) 405.778 nm      | 4.4                   | 20                                 | 40                        | 20                        | 40                        | 20                        | 30                        |
| S (I) 180.731 nm       | 6.9                   | 1000                               | 2000                      | no signal                 | no signal                 | 60                        | 70                        |
| S (I) 182.034 nm       | 6.9                   | 1000                               | 4000                      | no signal                 | no signal                 | 50                        | 100                       |
| Sb (I) 206.833 nm      | 6.0                   | 300                                | 600                       | no signal                 | no signal                 | 7                         | 10                        |
| Sb (I) 217.581 nm      | 5.7                   | 200                                | 300                       | no signal                 | no signal                 | 9                         | 10                        |
| Sb (I) 231.147 nm      | 5.4                   | 100                                | 200                       | 200                       | 600                       | 1                         | 5                         |
| Se (I) 196.09 nm       | 6.3                   | 500                                | 600                       | no signal                 | no signal                 | 10                        | 20                        |
| Se (I) 203.985 nm      | 6.3                   | 800                                | 1000                      | no signal                 | no signal                 | 20                        | 30                        |
| Sr (II) 407.771 nm     | 10.4                  | 0.05                               | 2                         | 0.1                       | 2                         | 0.02                      | 3                         |
| Sr (II) 421.552 nm     | 10.3                  | 0.07                               | 3                         | 0.2                       | 3                         | 0.03                      | 3                         |
| Ti (II) 307.864 nm     | 10.9                  | 6                                  | 10                        | 70                        | 80                        | 4                         | 6                         |
| Ti (II) 334.941 nm     | 10.6                  | 4                                  | 7                         | 6                         | 8                         | 0.2                       | 3                         |
| Ti (II) 336.121 nm     | 10.5                  | 20                                 | 30                        | 20                        | 30                        | 10                        | 20                        |
| Tl (II) 190.864 nm     | 12.6                  | no signal                          | no signal                 | no signal                 | no signal                 | 8                         | 10                        |
| Tl (I) 276.787 nm      | 4.5                   | 50                                 | 60                        | no signal                 | no signal                 | 10                        | 20                        |
| V (II) 292.464 nm      | 11.4                  | 20                                 | 30                        | no signal                 | no signal                 | 2                         | 4                         |
| V (II) 309.311 nm      | 11.1                  | 7                                  | 10                        | 30                        | 40                        | 0.4                       | 3                         |
| V (II) 311.071 nm      | 11.1                  | 20                                 | 20                        | 20                        | 40                        | 1                         | 4                         |
| Zn (II) 202.548 nm     | 15.5                  | 70                                 | 60                        | no signal                 | no signal                 | 0.2                       | 8                         |
| Zn (II) 206.191 nm     | 15.4                  | 200                                | 300                       | no signal                 | no signal                 | 0.5                       | 10                        |
| Zn (I) 213.856 nm      | 5.8                   | 20                                 | 30                        | no signal                 | no signal                 | 0.9                       | 8                         |
